# Supplementary material
Source: PubMed Central journal article supplement (PMC4030818)
Supplement: supp_mcu061_mcu061supp2.pdf [file supp_mcu061_mcu061supp2.pdf]

## SUPPLEMENTARY DATA

**Table S1.** Genome sequence databases used for identification of putative OVATEs

|                                   |                                                                                                                                                                                                                          |
|-----------------------------------|--------------------------------------------------------------------------------------------------------------------------------------------------------------------------------------------------------------------------|
| <i>Arabidopsis thaliana</i>       | TAIR <a href="http://www.arabidopsis.org/index.jsp">http://www.arabidopsis.org/index.jsp</a>                                                                                                                             |
| <i>Oryza sativa</i>               | Rice Genome Annotation <a href="http://rice.plantbiology.msu.edu/blast.shtml">http://rice.plantbiology.msu.edu/blast.shtml</a>                                                                                           |
| <i>Solanum lycopersicum</i>       | SGN <a href="http://solgenomics.net/tools/blast/">http://solgenomics.net/tools/blast/</a>                                                                                                                                |
| <i>Solanum tuberosum</i>          | SGN <a href="http://solgenomics.net/tools/blast/">http://solgenomics.net/tools/blast/</a>                                                                                                                                |
| <i>Zea mays</i>                   | Phytozome <a href="http://www.phytozome.net/">http://www.phytozome.net/</a><br>The TIGR Maize Database <a href="http://maize.jcvi.org/">http://maize.jcvi.org/</a>                                                       |
| <i>Populus trichocarpa</i>        | Phytozome <a href="http://www.phytozome.net/">http://www.phytozome.net/</a>                                                                                                                                              |
| <i>Mimulus guttatus</i>           | Phytozome <a href="http://www.phytozome.net/">http://www.phytozome.net/</a>                                                                                                                                              |
| <i>Vitis vinifera</i>             | Phytozome <a href="http://www.phytozome.net/">http://www.phytozome.net/</a><br>Genoscope <a href="http://www.genoscope.cns.fr/externe/GenomeBrowser/Vitis/">http://www.genoscope.cns.fr/externe/GenomeBrowser/Vitis/</a> |
| <i>Prunus persica</i>             | Phytozome <a href="http://www.phytozome.net/">http://www.phytozome.net/</a>                                                                                                                                              |
| <i>Carica papaya</i>              | Phytozome <a href="http://www.phytozome.net/">http://www.phytozome.net/</a>                                                                                                                                              |
| <i>Aquilegia coerulea</i>         | Phytozome <a href="http://www.phytozome.net/">http://www.phytozome.net/</a>                                                                                                                                              |
| <i>Selaginella moellendorffii</i> | Phytozome <a href="http://www.phytozome.net/">http://www.phytozome.net/</a>                                                                                                                                              |
| <i>Physcomitrella patens</i>      | Phytozome <a href="http://www.phytozome.net/">http://www.phytozome.net/</a>                                                                                                                                              |

**Table S3.** Primers used in quantitative real-time PCR

| Primer name | Sequences                         |
|-------------|-----------------------------------|
| ACTIN-F     | 5'- TTCCGTTGCCAGAGGTCCT-3'        |
| ACTIN-R     | 5'- GGGAGCCAAGGCAGTGATTTC-3'      |
| QOV1-F      | 5'- CTCTCCCCAAAATCCTAAT-3'        |
| QOV1-R      | 5'- TCTGATCTACAACACCCAAC-3'       |
| QOV2-F      | 5'- TCCTCGTCGTCCTCATCACCATCTT-3'  |
| QOV2-R      | 5'- TCGTGAATCAGTTCTACAGTCGCA-3'   |
| QOV3-F      | 5'- GGAGGAGAGAATAGCGGAAA-3'       |
| QOV3-R      | 5'- CGGACTGGAATCATTGTAAG-3'       |
| QOV4-F      | 5'- GGGTCGTTGTTATTCTGAG-3'        |
| QOV4-R      | 5'-ACTAGTTCCACCTGTTTCC-3'         |
| QOV5-F      | 5'-CCTCAACCCCACATCACCTT-3'        |
| QOV5-R      | 5'- GAACCAGCCACTATCAACAGA-3'      |
| QOV6-F      | 5'-AAAAGACTCCGACGACCC-3'          |
| QOV6-R      | 5'-TCAGTAAAAGCCCTAACG-3'          |
| QOV7-F      | 5'- TCAAAATCCACTTTCGACCA-3'       |
| QOV7-R      | 5'- CATCACTACTAAAATACCT-3'        |
| QOV8-F      | 5'- CAGTGTTCTTTGACCCCTTTG-3'      |
| QOV8-R      | 5'- CTTTCTGATCTAGCCCTTTT-3'       |
| QOV9-F      | 5'- CCTCCAATATTAACCAAGCC-3'       |
| QOV9-R      | 5'- TGTTCTCAATTTACCCAG-3'         |
| QOV10-F     | 5'- AACCATCACAAAACCCCA-3'         |
| QOV10-R     | 5'-TACCGAATCCTTGAACAGC-3'         |
| QOV11-F     | 5'- TTATCAGAAATCATTAGCCC-3'       |
| QOV11-R     | 5'- AATCCTTACCACCGCCACAC-3'       |
| QOV12-F     | 5'- TTCTGTTACCAACTACGTCTCAGTC-3'  |
| QOV12-R     | 5'- GGAAATCTAATTCAGGGAATTTATC-3'  |
| QOV13-F     | 5'- CTTTTTAGACCCTTCAAACACTG-3'    |
| QOV13-R     | 5'- GAACCCCTTAATGATTAECTCC-3'     |
| QOV14-F     | 5'- AGACAAGTGGCAACATTTATCAAGAC-3' |
| QOV14-R     | 5'- AAGGAGTAAGAGATTTTCTACGAGGT-3' |
| QOV15-F     | 5'- CAACATTTACAACCTCACTT-3'       |
| QOV15-R     | 5'- TCTTTCTCTAATCTCAACCC-3'       |
| QOV16-F     | 5'- CTCAATCTTTGTTTCACTA-3'        |
| QOV16-R     | 5'- AAAATGCATACTATGATGTT-3'       |
| QOV17-F     | 5'- TTTGAAGAAACAGAGGAAGAA-3'      |

---

|                |                              |
|----------------|------------------------------|
| <b>QOV17-R</b> | 5'- GCGGAATCAGAGCTGGGAATG-3' |
| <b>QOV18-F</b> | 5'- CTCCTATGCTATGTAGATTGC-3' |
| <b>QOV18-R</b> | 5'- ACTTGTTTTTTCACCTGACTC-3' |
| <b>QOV19-F</b> | 5'- TCACAACATTTTCAACTCTCA-3' |
| <b>QOV19-R</b> | 5'- GGTAGAAACTCGAGCCTCTTA-3' |
| <b>QOV20-F</b> | 5'- AATAGTAGTCACGGGTTTGT-3'  |
| <b>QOV20-R</b> | 5'- CCTCATAAGGATCCCTCGAT-3'  |
| <b>QOV21-F</b> | 5'- ATTGCCACGTTGTGGTAACCT-3' |
| <b>QOV21-R</b> | 5'- GCCTCGAAATAGAACCTCTTT-3' |
| <b>QOV22-F</b> | 5'- TCCTCTTTTTCTCCATTTTTA-3' |
| <b>QOV22-R</b> | 5'- ACTAGTTTTTTCACCTGCCTC-3' |
| <b>QOV23-F</b> | 5'-ATGTTTGGTCCATTCCCAGA-3'   |
| <b>QOV23-R</b> | 5'-TTCGAACGATAACCTCCTTG-3'   |
| <b>QOV24-F</b> | 5'- TGATGATAATGAAGCGGAAAT-3' |
| <b>QOV24-R</b> | 5'-TGCAATGAAAAAACGACGAGA-3'  |
| <b>QOV25-F</b> | 5'- TTCCTTCACCAATTACTCCA-3'  |
| <b>QOV25-R</b> | 5'- TATATCCCTCATTTTCCCTT-3'  |
| <b>QOV26-F</b> | 5'- AAAGCACCATTTCATCACC-3'   |
| <b>QOV26-R</b> | 5'- CCACAATCGTTTCCACCAGA-3'  |

---

**Table S4.** Average  $\omega$  ratios of each subgroup

| <b>Subgroup</b> | <b><math>\omega</math> (one ratio model)</b> |
|-----------------|----------------------------------------------|
| <b>1</b>        | 0.23                                         |
| <b>2</b>        | 0.14                                         |
| <b>3</b>        | 0.13                                         |
| <b>4</b>        | 0.12                                         |
| <b>5</b>        | 0.15                                         |
| <b>6</b>        | 0.13                                         |
| <b>7</b>        | 0.13                                         |
| <b>8</b>        | 0.13                                         |
| <b>9</b>        | 0.07                                         |
| <b>10</b>       | 0.08                                         |
